# Supplementary material
Source: PubMed Central journal article supplement (PMC2890422)
Supplement: 1000993107_pnas.1000993107_SI.pdf [file 1000993107_pnas.1000993107_SI.pdf]

# Supporting Information

Buchwald et al. 10.1073/pnas.1000993107

## SI Text

**Nanoliter Liquid Chromatography (nanoLC)-MS/MS.** Dissolved crystals were digested with Trypsin and the peptides were separated by online nanoLC and analyzed by electrospray tandem mass spectrometry as described in ref. S1. Data analysis was performed with the MaxQuant software supported by Mascot as the database search engine for peptide identifications.

**Surface Plasmon Resonance (SPR) Spectroscopy.** SPR spectroscopy was performed at 25 °C using a BIAcore 3000 (GE Healthcare). Anti-GST antibody was immobilized on a CM5 chip using an amine coupling procedure with a 30 µg/mL antibody at

5 µL/min in 10 mM sodium acetate at pH 5.0. Approximately 10,000 response units (RUs) were immobilized on the chip. The anti-GST chips were then derivatized with 100–150 RUs of GST-tagged UPF3 in 40 mM Tris · HCl pH 7.5, 300 mM NaCl, and 1 mM DTT, with the addition of 3 mM MgCl<sub>2</sub> in case of the EJC or of 0.05% Tween 20 in case of UPF2 (running buffer). An anti-GST flow cell was used as control. Binding experiments were carried out at a flow rate of 30 µL/min in running buffer. The BIAcore 3000 evaluation software was used for analysis of the experimental data. The saturation binding values were fitted according to a one-site binding model using the Origin software.

1. Olsen JV, et al. (2010) Parts per million mass accuracy on an Orbitrap mass spectrometer via lock mass injection into a C-trap. *Mol Cell Proteomics* 4:2021

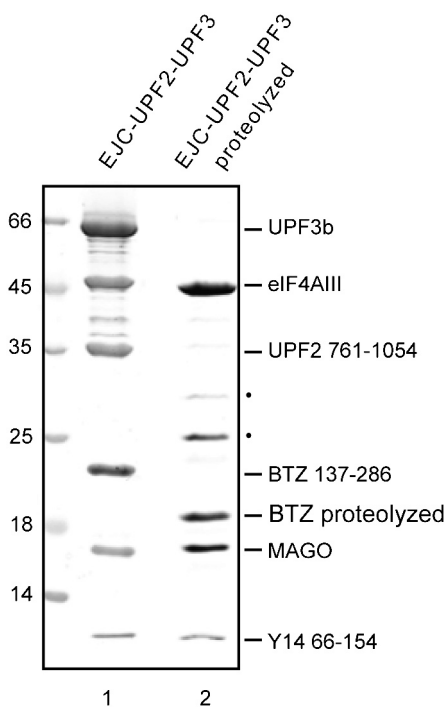

**Fig. S1.** Purification of a minimal complex of the exon junction complex (EJC) with UPF3b for crystallization. The peaks of the final size-exclusion chromatography purifications of the intact and proteolyzed EJC-UPF3b-UPF2 complexes were separated on a 10% (wt/vol) acrylamide SDS-PAGE gel (lanes 1 and 2, respectively) together with a protein marker (left lane), and stained with Coomassie. The corresponding protein constructs are labeled on the right. Crystals were obtained from the EJC-containing mixture in lane 2 (note that the presence of low molecular weight peptides is not assessed in this type of gel). Dots indicate fragments of Up-frameshift proteins (UPF) that peaked at a shoulder in the chromatogram and could not be separated from the peak fractions.





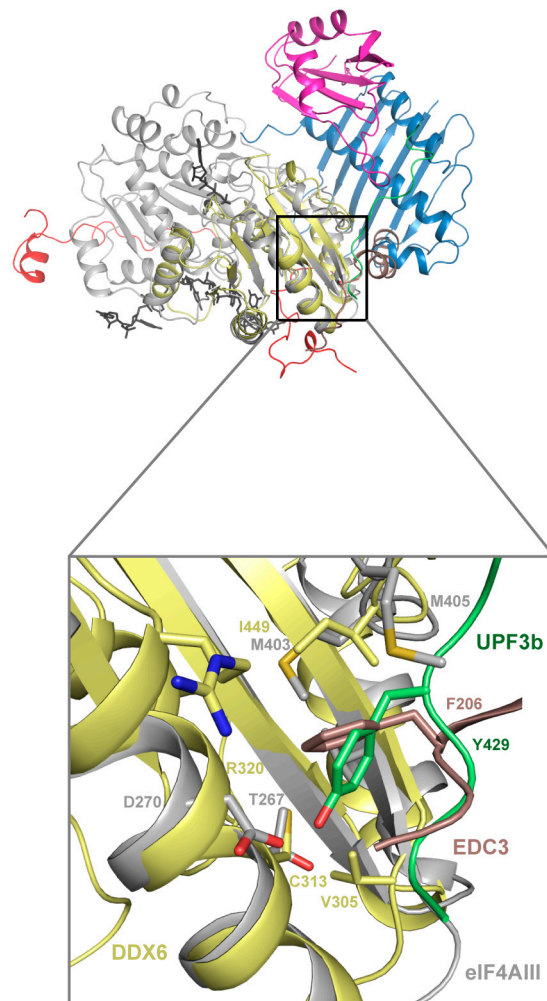

**Fig. S7.** Protein recognition at similar molecular surfaces. The surfaces of eIF4AIII (gray) and DDX6 (yellow) are shown (after optimal superimposition) bound to the corresponding interacting proteins, UPF3b and EDC3 (light brown). The close-up view shows the same structural position for Tyr429<sub>UPF3b</sub> and Phe206<sub>EDC3</sub>. The structures are shown after optimal superimposition in the same orientation as in Fig. 4A.
